# Supplementary material for: A ZnO-gated porphyrinic metal–organic framework-based drug delivery system for targeted bimodal cancer therapy
Source: Royal Society of Chemistry journal article supplement (doi:10.1039/c8tb02663g), 2018-01-01
Supplement: c8tb02663g1.pdf [file c8tb02663g1.pdf]

## Supporting Information

### **A ZnO-gated porphyrinic metal-organic framework-based drug delivery system for targeted bimodal cancer therapy**

*Qiu-ge Zhao, Jing Wang, Yu-peng Zhang, Jing Zhang, An-na Tang\* and De-ming  
Kong\**

*State Key Laboratory of Medicinal Chemical Biology, Tianjin Key Laboratory of  
Biosensing and Molecular Recognition, Collaborative Innovation Center of Chemical  
Science and Engineering, Key Laboratory of Functional Polymer Materials (Nankai  
University), Ministry of Education, College of Chemistry, Nankai University, Tianjin,  
300071, P. R. China.*

## List of Contents

|    |                                                                                 |    |
|----|---------------------------------------------------------------------------------|----|
| 1. | Characterization of porous structure of porMOF .....                            | S3 |
| 2. | pH-dependent release of DOX from the carriers without or with ZnO encapsulation | S4 |
| 3. | DOX fluorescence measurements in selected cells .....                           | S5 |
| 4. | Confocal fluorescence microscopy images of HeLa and NIH3T3 cells.....           | S6 |

## 1. Characterization of porous structure of porMOF

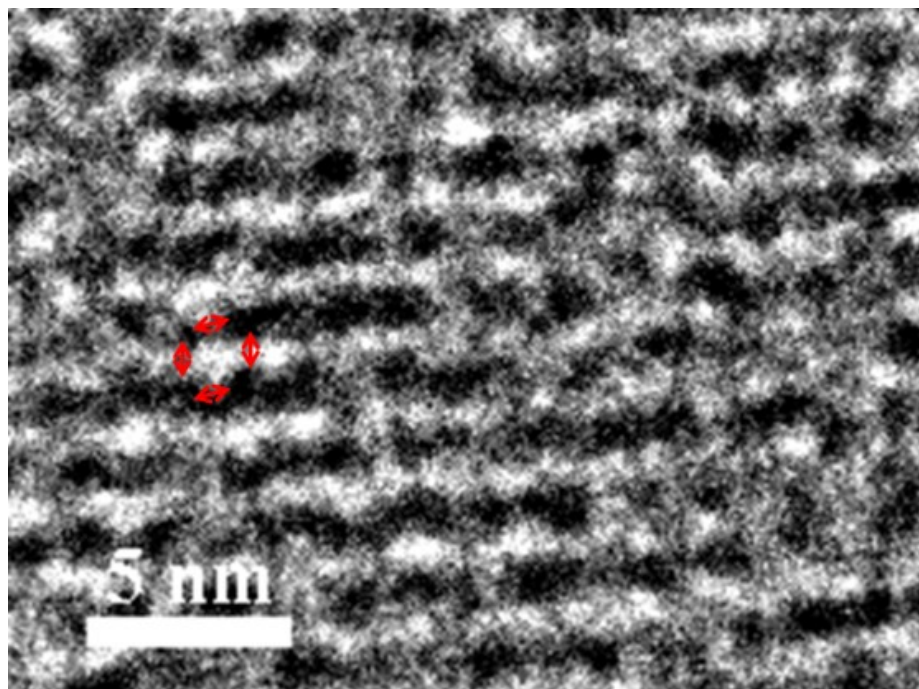

**Figure S1.** HR-TEM of porMOF

## 2. pH-dependent release of DOX from the carriers without or with ZnO encapsulation.

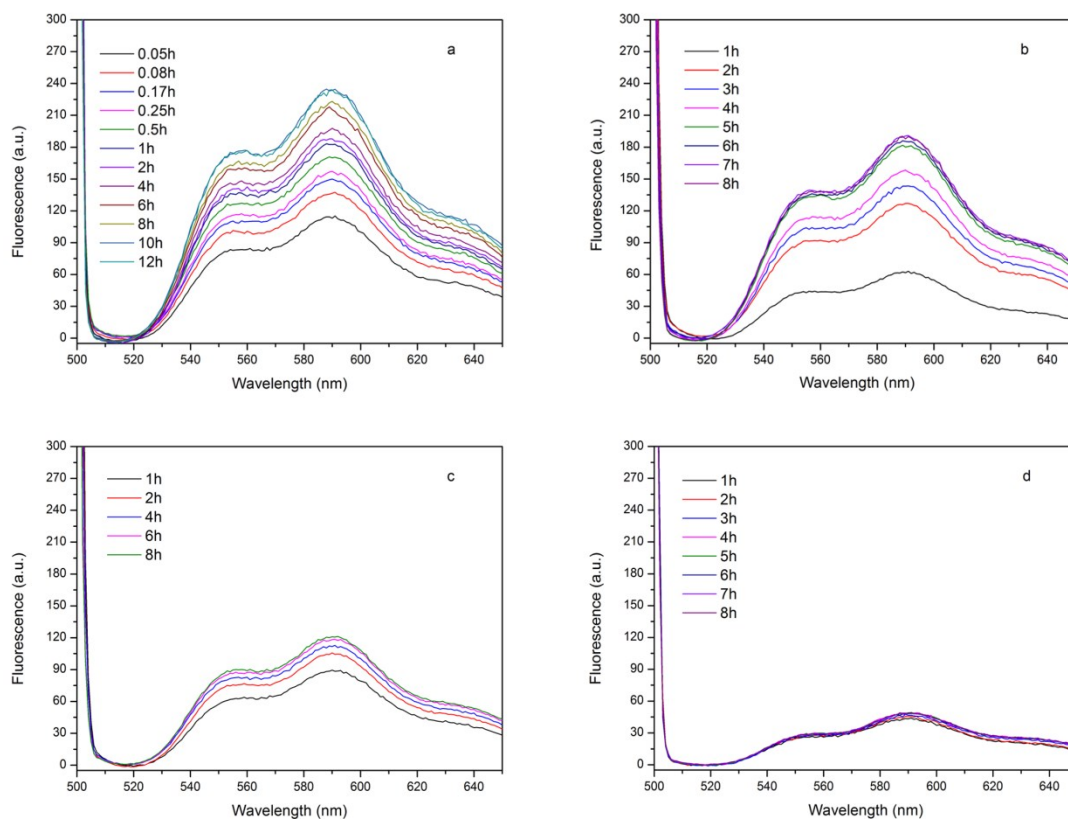

**Figure S2.** Time-dependent fluorescence spectra of DOX released from DOX@porMOF or ZnO-gated DOX@porMOF system under different pH conditions. (a) DOX@porMOF at pH 5.0; (b) ZnO-gated DOX@porMOF at pH 5.0; (c) DOX@porMOF at pH 7.4; (d) ZnO-gated DOX@porMOF at pH 7.4.  $\lambda_{\text{ex}} = 488 \text{ nm}$ .

### 3. DOX fluorescence measurements in selected cells

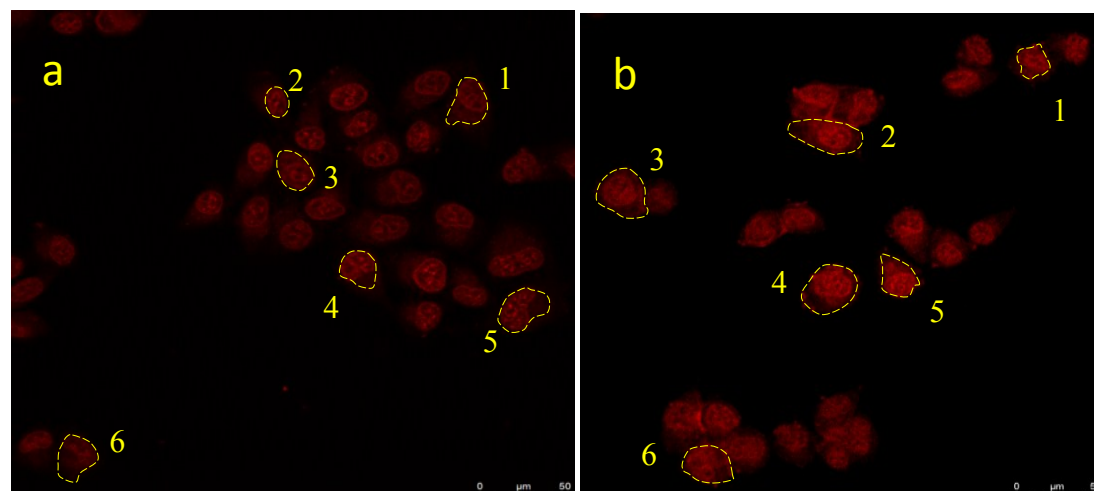

| c Cell  | Fluorescence intensity (a.u.) |            |
|---------|-------------------------------|------------|
|         | Figure a                      | Figure b   |
| 1       | 14.93                         | 24.86      |
| 2       | 15.26                         | 26.29      |
| 3       | 15.20                         | 21.25      |
| 4       | 15.53                         | 26.52      |
| 5       | 13.10                         | 26.46      |
| 6       | 15.49                         | 23.72      |
| Mean±SD | 14.92±0.84                    | 24.85±1.90 |

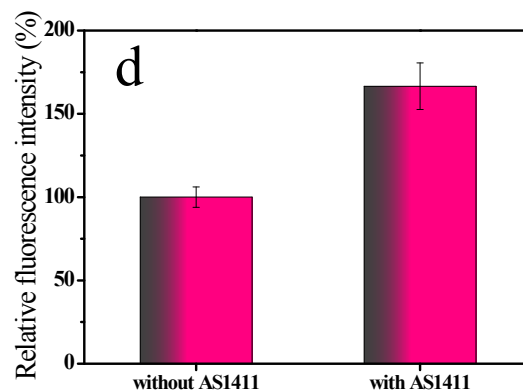

**Figure S3.** DOX fluorescence measurements in selected cells. (a, b) Cell selection from the images of HeLa cells treated with 80  $\mu\text{g}/\text{mL}$  (a) ZnO-gated DOX@porMOF or (b) ZnO-gated DOX@porMOF-AS1411 for 4 h. (c) Fluorescence intensities measured from the selected cells. (d) Histogram of the relative average fluorescence intensity.

#### 4. Confocal fluorescence microscopy images of HeLa and NIH3T3 cells

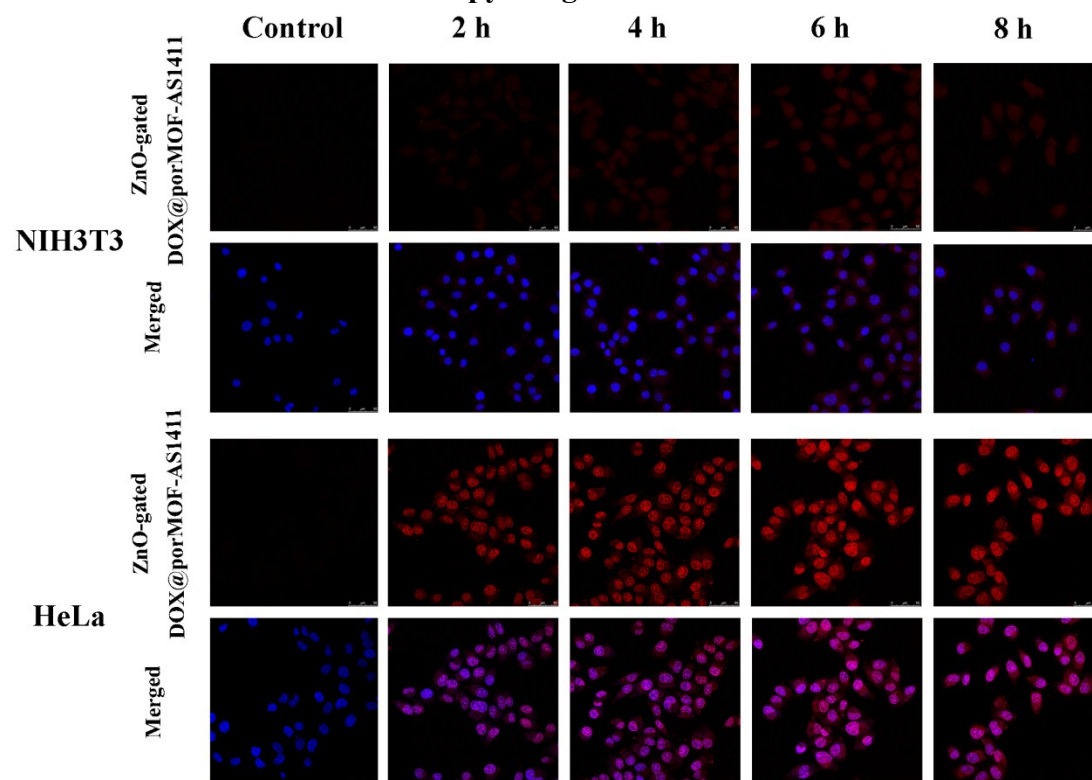

**Figure S4.** Confocal fluorescence microscopy images of HeLa and NIH3T3 cells after incubating with ZnO-gated DOX@porMOF-AS1411 for different time.
